# Supplementary material for: Differential Transcriptome Responses to Aflatoxin B1 in the Cecal Tonsil of Susceptible and Resistant Turkeys
Source: MDPI journal article supplement (doi:10.3390/toxins11010055), 2019-01-18
Supplement: s1 [file s1]

# Supplementary Materials: Differential Transcriptome Responses to Aflatoxin B<sub>1</sub> in the Cecal Tonsil of Susceptible and Resistant Turkeys

Kent M. Reed, Kristelle M. Mendoza and Roger A. Coulombe, Jr.

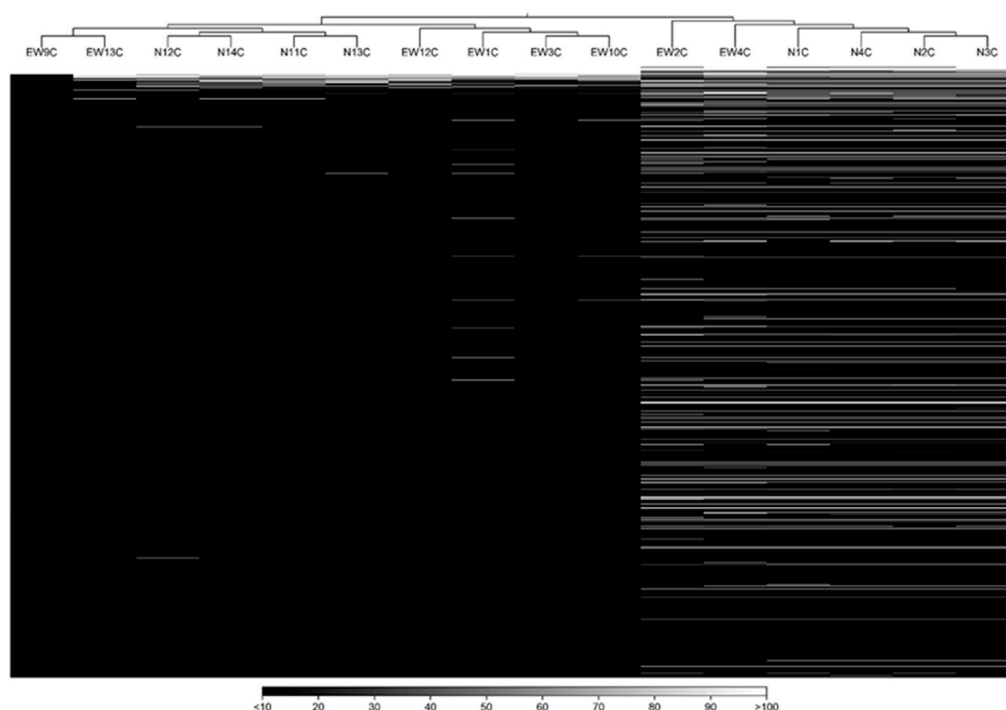

**Figure S1.** Hierarchical clustering of samples based on Euclidean distance reiterated relationships shown by PCA.

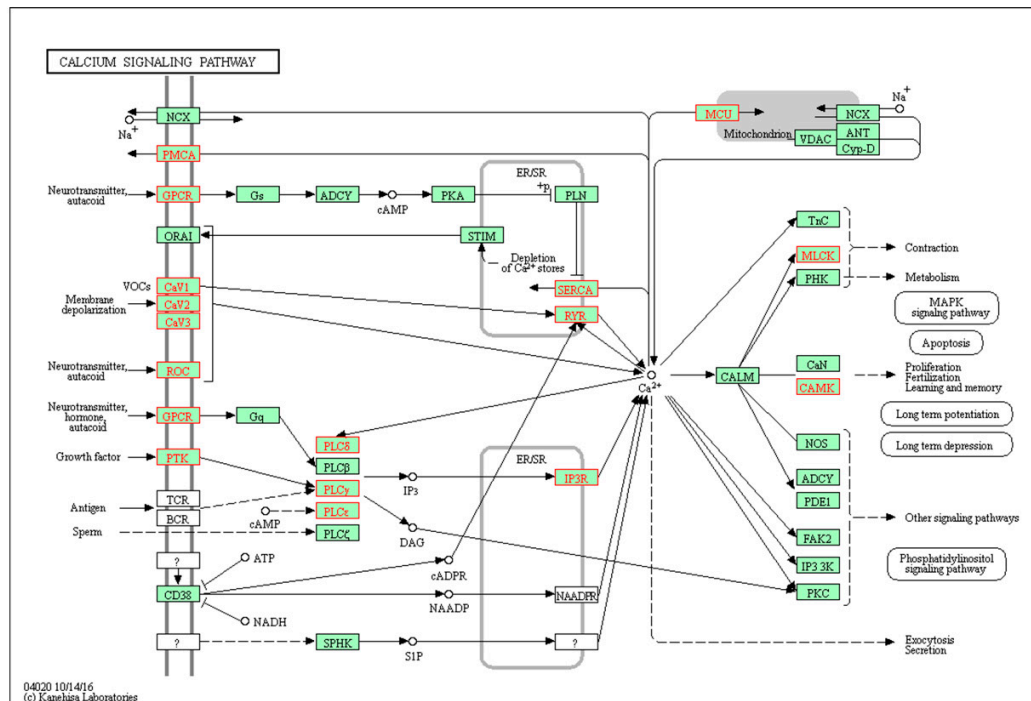

**Figure S2.** Kegg calcium-signaling pathway.
